# Supplementary material for: Tetrapodal amidoxime ligands I. Coordination isomerism due to self-complementary dimerization of a pyramidal cobalt(iii) coordination module
Source: Royal Society of Chemistry journal article supplement (doi:10.1039/c2dt11847e), 2012-01-01
Supplement: c2dt11847e.pdf [file c2dt11847e.pdf]

## **Tetrapodal amidoxime ligands I.**

### **Coordination isomerism due to self-complementary dimerization of an octahedral cobalt(III) complex**

John P. Boyd\*, Elisabeth Irran, Andreas Grohmann\*

Institut für Chemie, Technische Universität Berlin, Straße des 17. Juni 135, 10623 Berlin, Germany

#### **Supporting Information**

##### Content

- p 2 ... 5 - Remarks on ligand **4** and its preparation
- 3 - Powder diffraction of commercial LiH
- 4 - Solid state structure of **10**
- 5 ... 7 - <sup>1</sup>H-NMR spectra of **4**, **10** and **11**
- p 8 ... 20 - Additional crystallographic information for **11** · 12 H<sub>2</sub>O
- p 18 ... 20 - Extended H-bond analysis for **11** · 12 H<sub>2</sub>O

*Remarks concerning the preparation of methylmalononitrile 7 and its deprotonation*

It is not easy to prepare methylmalononitrile by direct methylation of malononitrile itself because one usually obtains a mixture of the starting material, methylmalononitrile and dimethylmalononitrile which is hard to separate by distillation or chromatography, nevertheless it can be done by using phase transfer catalysts (E. Diez-Barra, A. de la Hoz, A. Moreno and P. Sanchez-Verdu, *Perkin Trans. I* **1991**, 2589-2592.). We consider the method described in the main text well suited for the preparation of methylmalononitrile on a molar scale. On a smaller scale however, PTC might provide a more convenient access to the material.

From a historic perspective it is interesting to note that methylmalononitrile was first prepared by Arthur Hantzsch more than 100 years ago (*Ber.* **1899**, 32(1), 641–650.) by reacting the silver salt of cyanoform with methyl iodide to obtain methylcyanoform which forms methylmalononitrile in an unusual alkaline hydrolysis. In 1933 Strack and Schwaneberg described the preparation of methylmalononitrile from ethyl 2-bromopropionate in a three step procedure (*Ber.* **1933**, 66(9), 1330–1333). Other alkylmalononitriles (e.g. ethylmalononitrile) can be prepared in a single step procedure by the reductive alkylation of malononitrile with aldehydes or ketones in the presence of sodium borohydride (F. Tayyari, D. E. Wood, P. E. Fanwick, R. E. Sammelson, *Synthesis*, **2008**, 279-285.).

Van der Plas et al. (*Tetrahedron* **1988**, 44(10), 2977-2983. *Tetrahedron* **1989**, 45(16), 5151-5162) used sodium hydride to deprotonate 5,5-dicyanopentyne. However, we found the use of lithium hydride more convenient in our studies because commercial LiH can be safely stored and shipped in pure form (unlike sodium hydride which is usually shipped in mineral oil). Commercial lithium hydride is rarely used in organic chemistry due to its low reactivity. As an example its reaction with methanol is very slow even under reflux and it does not react with tert-butanol. It does react with water immediately, but unlike sodium or potassium hydride the nascent hydrogen does not ignite in air.

We store our LiH in a Schlenk-flask, below you see a powder diffraction pattern of the commercial lithium hydride we used. The colored lines represent the comparison with a data base.

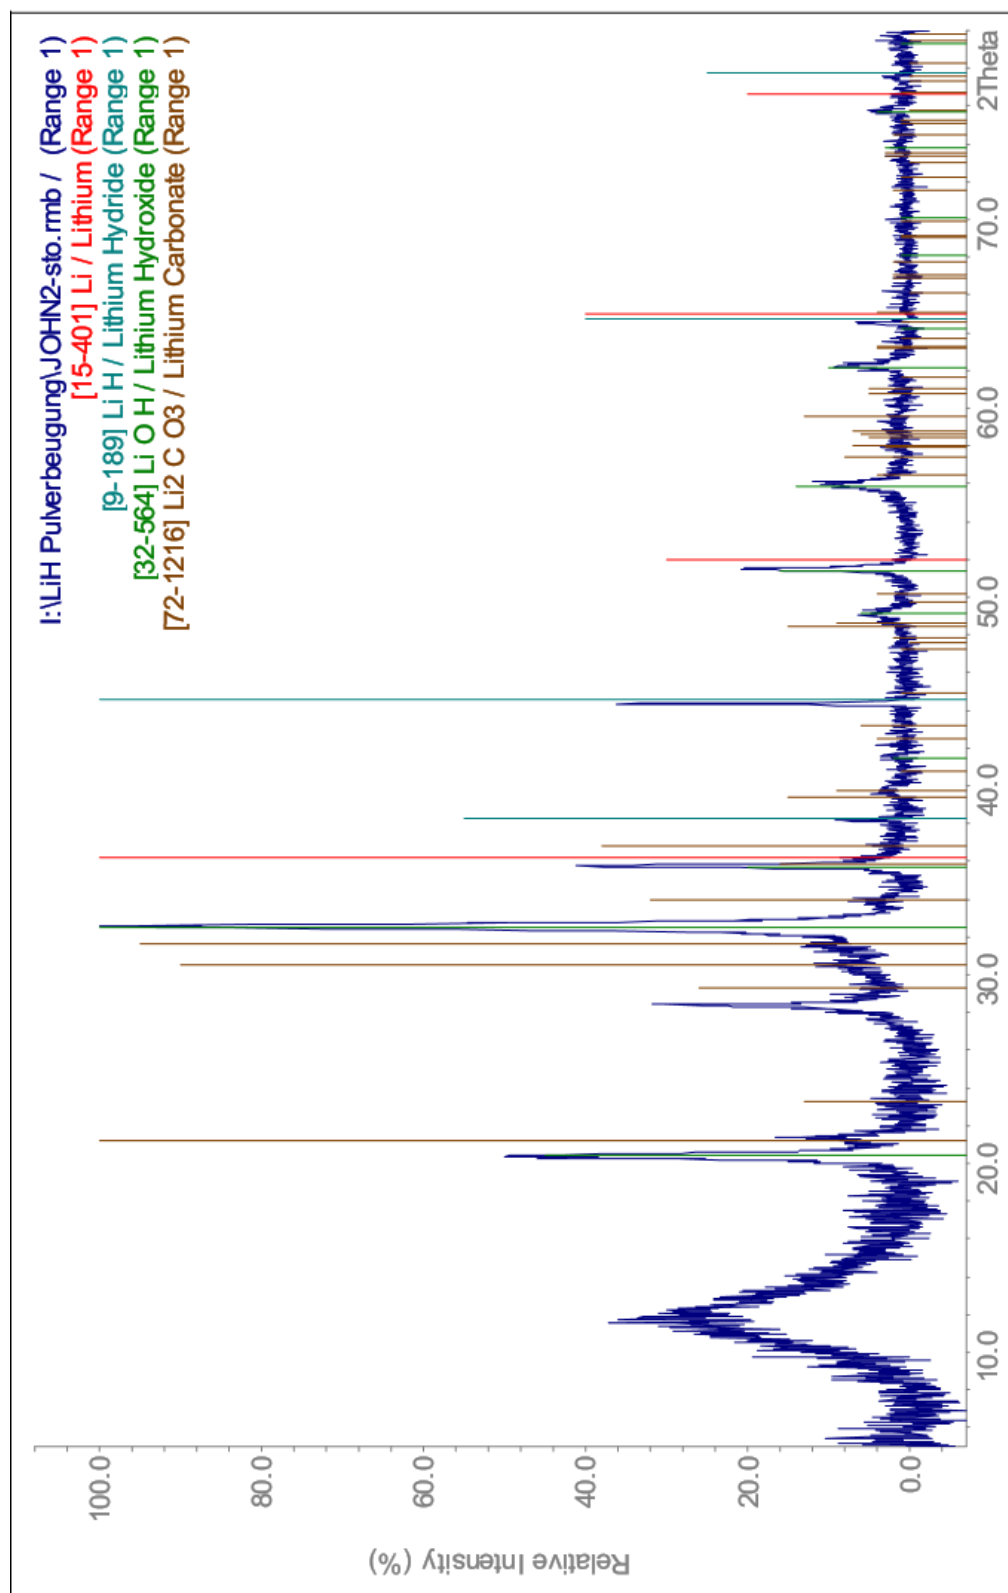

**Figure S1:** Powder diffraction pattern of the commercial lithium hydride used

It can clearly be seen that commercial lithium hydride contains lithium carbonate and lithium hydroxide. There is another impurity present we could not identify (28°), the compound we used is grey, not colourless.

*2,2'-(Pyrimidine-2,4-diyl)bis(2-methylmalononitrile) 10*

The solid state structure of **10** shows a disorder similar to the one described in the main text, but in this structure stereoisomerism does not complicate the matter further. Bond angles and distances are given in the following table (for general crystallographic information see main text).

**Table S2:** selected interatomic distances (Å) and angles (°)

|         |          |               |          |
|---------|----------|---------------|----------|
| C22-N13 | 1.138(2) | C13-N11       | 1.141(2) |
| C21-N14 | 1.143(2) | C11-N12       | 1.141(2) |
| C23-C21 | 1.480(2) | N14-C21-C23   | 178.1(1) |
| C23-C22 | 1.485(2) | N13-C22-C23   | 178.6(1) |
| C12-C13 | 1.482(2) | N11-C13-C12   | 176.4(1) |
| C12-C11 | 1.481(2) | N12-C11-C12   | 178.5(1) |
| C2-C12  | 1.530(2) | C24-C23-C6-N1 | 77.8(1)  |
| C6-C23  | 1.532(2) | C14-C12-C2-N1 | 74.2(1)  |

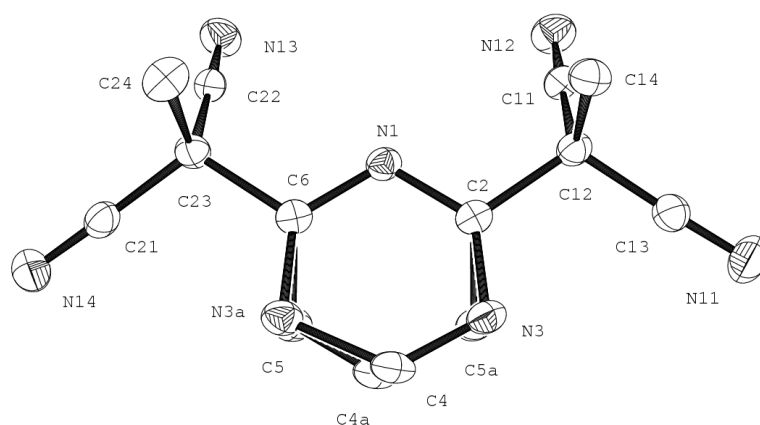

**Figure S3:** Solid state structure of **10** (ellipsoids drawn at the 50% probability level)



**Figure S5:** 200 MHz  $^1\text{H}$ -NMR of ligand **4** with 2D  $^1\text{H}$ - $^1\text{H}$  NOESY based assignment  
(minor impurities are assigned to threefold addition products, cf. main text)

$^1\text{H}$ -NMR spectroscopic analysis of **11**

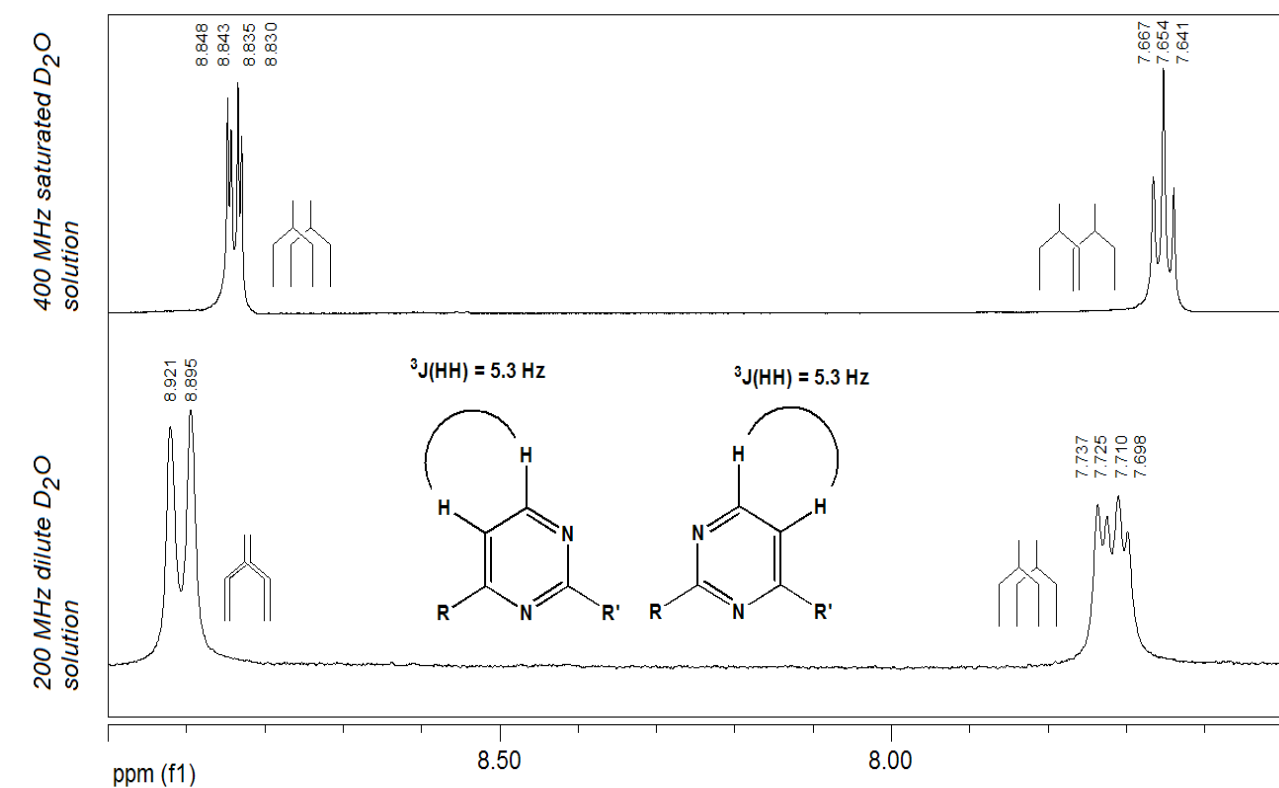

**Figure S6:** field and concentration dependent  $^1\text{H}$ -NMR resonances of **11** in  $\text{D}_2\text{O}$

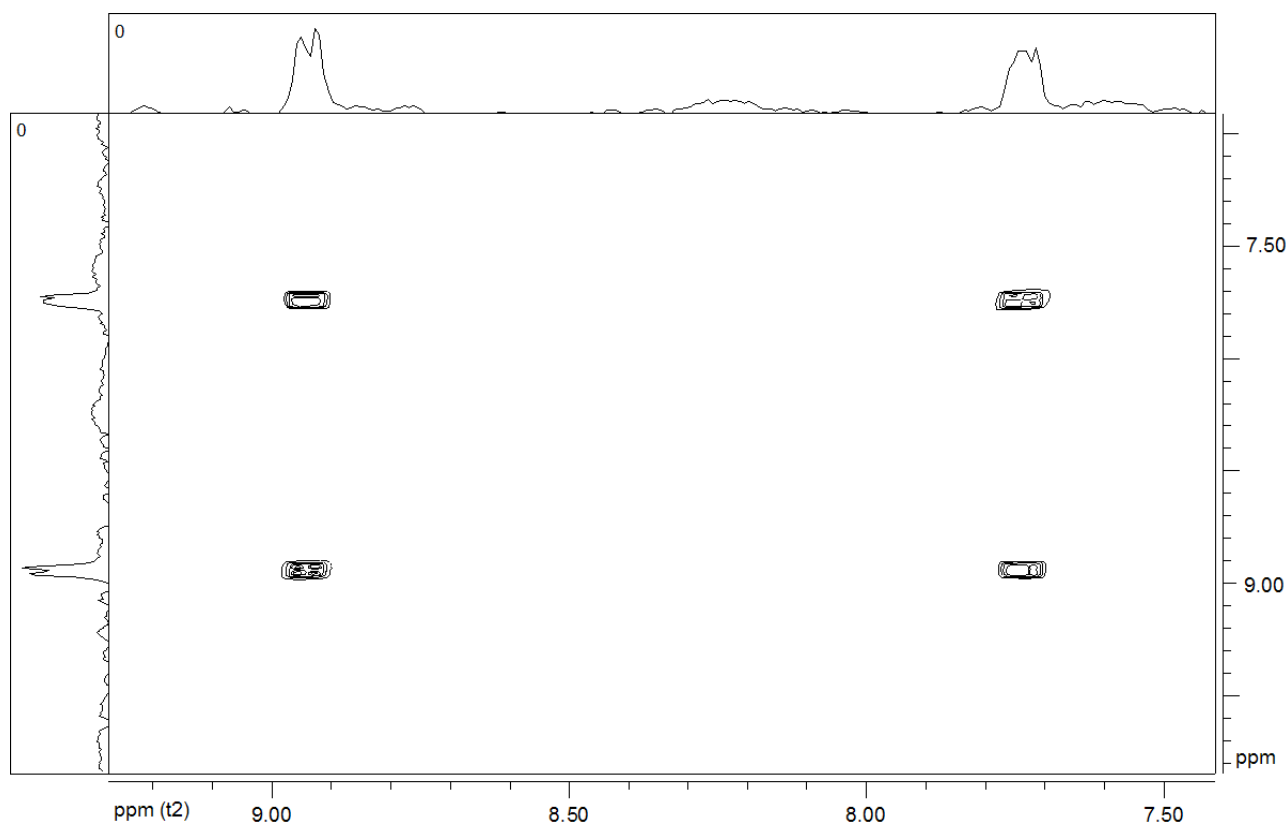

**Figure S7:** 200 MHz DQF-COSY, coupling of the aromatic CH-protons of **11** in D<sub>2</sub>O

<sup>1</sup>H-NMR-spectroscopy does not yield as conclusive evidence of isomery as <sup>13</sup>C{<sup>1</sup>H}-NMR-spectroscopy, which is presented in the main text. However, field dependent signal analysis (cf. Figure S6) of the aromatic CH-resonances does show consistent behaviour, as the signals can be interpreted as being composed of overlapping doublets with analogous <sup>3</sup>J(HH) coupling constants of 5.3 Hz. Within the interpretation presented in the main text, this behaviour is explained by the two possible orientations of the pyrimidine ring, while the isomerism arising upon different combinations of these orientations is not resolved (Figure S7 is supposed to illustrate the coupling between the two signal groups). Comparable behaviour is observed for the singlet signals belonging to the methyl groups when different solvents are compared (DMSO and deueterium oxide, cf. Figure S8).

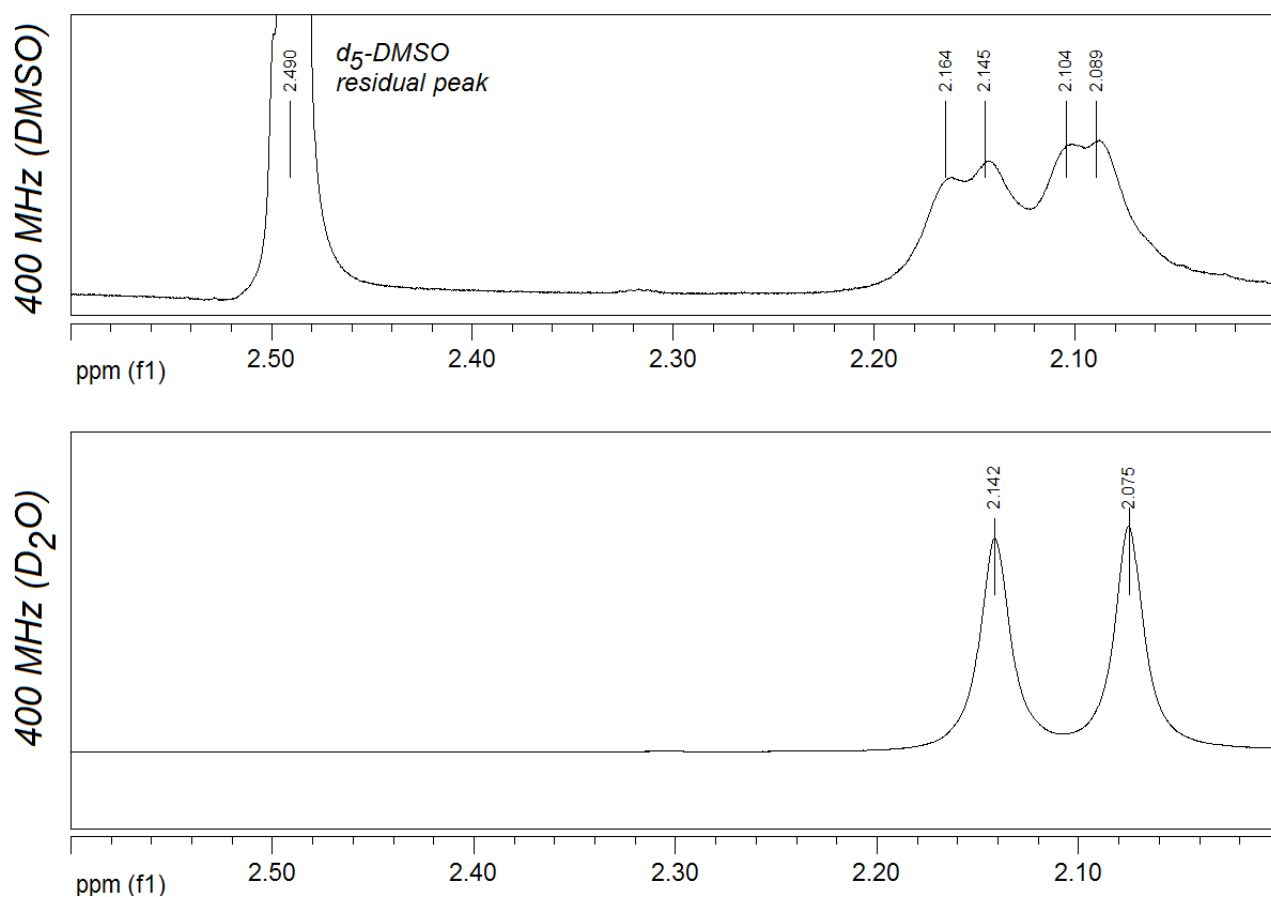

**Figure S8:** Solvent dependent signal form of the resonances belonging to the methyl groups of **11**.

(Note: In the experimental section of the main text, the 200 MHz <sup>1</sup>H-Spectrum of **11** in DMSO is presented. At 200 MHz only two signals are visible in the methyl region due to lower resolution.)

*Additional information on the crystal structure of 11 · 12 H<sub>2</sub>O*

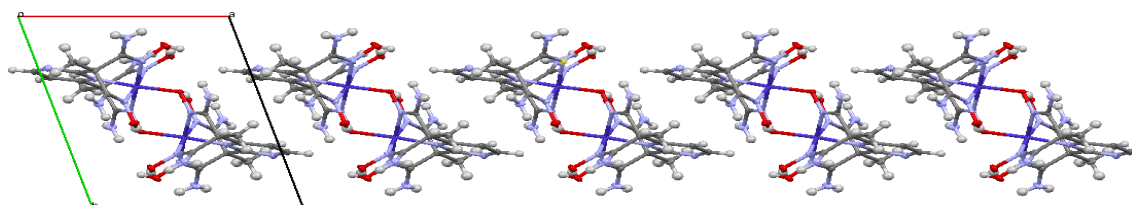



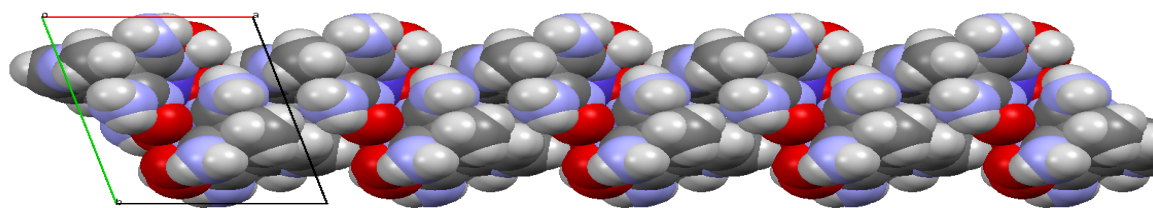

**Figure S9:** Ellipsoid & spacefill representation of the molecule packing

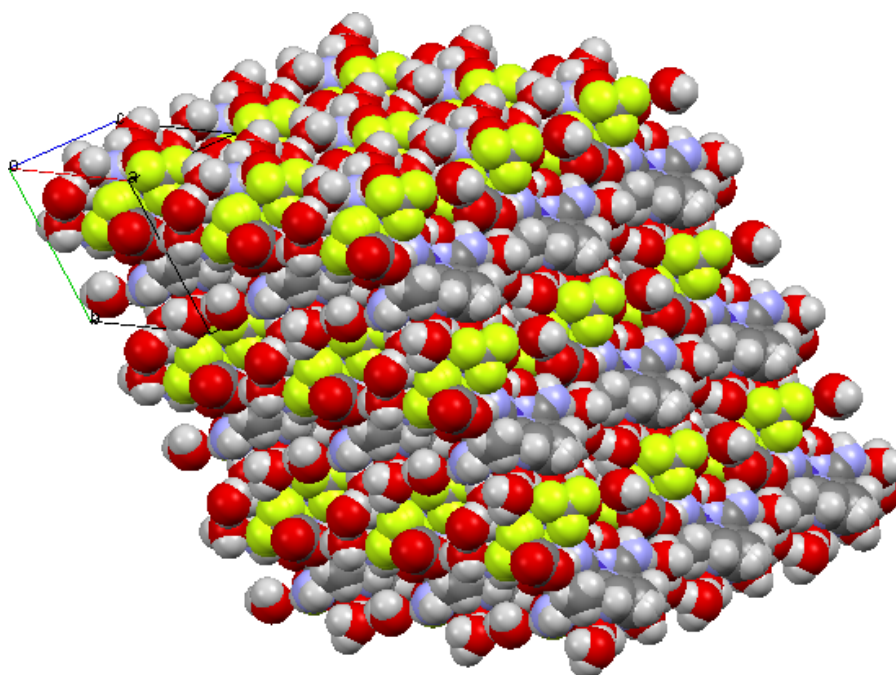

**Figure S10:**  $3 \times 3 \times 3$  unit cells

**Table S11.** Crystal data and structure refinement for **11**.

|                     |                                                                                                 |
|---------------------|-------------------------------------------------------------------------------------------------|
| Identification code | <b>11 · 12 H<sub>2</sub>O</b>                                                                   |
| Empirical formula   | C <sub>32</sub> H <sub>62</sub> Co <sub>2</sub> F <sub>12</sub> N <sub>20</sub> O <sub>28</sub> |
| Formula weight      | 1520.88                                                                                         |
| Temperature         | 150(2) K                                                                                        |
| Wavelength          | 0.71073 Å                                                                                       |
| Crystal system      | Triclinic                                                                                       |
| Space group         | P-1                                                                                             |

|                                   |                                             |                 |
|-----------------------------------|---------------------------------------------|-----------------|
| Unit cell dimensions              | a = 9.2213(4) Å                             | α = 69.118(5)°. |
|                                   | b = 12.9948(6) Å                            | β = 83.997(4)°. |
|                                   | c = 13.4621(8) Å                            | γ = 73.435(4)°. |
| Volume                            | 1444.63(13) Å <sup>3</sup>                  |                 |
| Z                                 | 1                                           |                 |
| Density (calculated)              | 1.748 Mg/m <sup>-3</sup>                    |                 |
| Absorption coefficient            | 0.716 mm <sup>-1</sup>                      |                 |
| F(000)                            | 780                                         |                 |
| Crystal size                      | 0.40 x 0.22 x 0.11 mm <sup>3</sup>          |                 |
| Theta range for data collection   | 3.28 to 25.00°.                             |                 |
| Index ranges                      | -10 ≤ h ≤ 10, -12 ≤ k ≤ 15, -11 ≤ l ≤ 15    |                 |
| Reflections collected             | 10144                                       |                 |
| Independent reflections           | 5065 [R(int) = 0.0292]                      |                 |
| Completeness to theta = 25.00°    | 99.7 %                                      |                 |
| Absorption correction             | Semi-empirical from equivalents             |                 |
| Max. and min. transmission        | 0.9254 and 0.7626                           |                 |
| Refinement method                 | Full-matrix least-squares on F <sup>2</sup> |                 |
| Data / restraints / parameters    | 5065 / 110 / 535                            |                 |
| Goodness-of-fit on F <sup>2</sup> | 0.973                                       |                 |
| Final R indices [I > 2σ(I)]       | R1 = 0.0389, wR2 = 0.0892                   |                 |
| R indices (all data)              | R1 = 0.0534, wR2 = 0.0928                   |                 |
| Largest diff. peak and hole       | 0.555 and -0.327 e.Å <sup>-3</sup>          |                 |

**Table S12.** Atomic coordinates ( × 10<sup>4</sup> ) and equivalent isotropic displacement parameters ( Å<sup>2</sup> × 10<sup>3</sup> ) for boyd30. U(eq) is defined as one third of the trace of the orthogonalized U<sub>ij</sub> tensor.

|        | x         | y        | z        | U(eq) |
|--------|-----------|----------|----------|-------|
| C(25B) | 10260(20) | 7100(30) | 3887(19) | 15(3) |
| C(26B) | 9620(30)  | 6790(40) | 3200(30) | 15(3) |

|        |           |          |          |       |
|--------|-----------|----------|----------|-------|
| N(26B) | 9550(30)  | 7280(40) | 4760(20) | 18(2) |
| C(25A) | 10150(20) | 7220(30) | 3659(19) | 15(3) |
| C(26A) | 9560(30)  | 7330(40) | 4620(30) | 18(2) |
| N(26A) | 9490(20)  | 6860(30) | 3060(20) | 15(3) |
| Co(1)  | 5661(1)   | 6332(1)  | 4760(1)  | 11(1) |
| O(8)   | 6464(2)   | 4409(2)  | 6771(2)  | 18(1) |
| O(11)  | 3563(2)   | 8457(2)  | 4799(2)  | 24(1) |
| O(3)   | 6299(2)   | 3953(1)  | 4967(1)  | 12(1) |
| O(10)  | 3505(2)   | 7950(2)  | 3115(2)  | 19(1) |
| C(19)  | 8200(3)   | 7073(2)  | 4952(2)  | 14(1) |
| C(20)  | 8199(3)   | 6621(2)  | 3424(2)  | 14(1) |
| N(4)   | 7533(2)   | 6720(2)  | 4337(2)  | 13(1) |
| N(2)   | 6418(2)   | 5029(2)  | 4328(2)  | 12(1) |
| N(5)   | 6524(2)   | 5521(2)  | 6152(2)  | 13(1) |
| N(12)  | 7611(3)   | 4207(2)  | 3090(2)  | 19(1) |
| N(13)  | 7794(3)   | 5411(2)  | 7604(2)  | 18(1) |
| N(14)  | 5295(3)   | 8870(2)  | 5982(2)  | 22(1) |
| N(15)  | 5225(3)   | 7654(2)  | 1522(2)  | 20(1) |
| N(7)   | 4979(2)   | 7221(2)  | 3336(2)  | 13(1) |
| N(6)   | 4960(2)   | 7659(2)  | 5164(2)  | 14(1) |
| C(22)  | 7329(3)   | 6269(2)  | 2741(2)  | 14(1) |
| C(17)  | 7366(3)   | 7151(2)  | 5990(2)  | 14(1) |
| C(27)  | 8203(3)   | 6240(2)  | 1719(2)  | 18(1) |
| C(28)  | 8244(3)   | 7590(2)  | 6579(2)  | 20(1) |
| C(23)  | 7090(3)   | 5094(2)  | 3416(2)  | 14(1) |
| C(16)  | 7201(3)   | 5958(2)  | 6633(2)  | 14(1) |
| C(21)  | 5744(3)   | 7122(2)  | 2499(2)  | 14(1) |
| C(18)  | 5766(3)   | 7962(2)  | 5694(2)  | 15(1) |
| C(30)  | 151(4)    | 9391(3)  | 7303(3)  | 34(1) |
| C(29)  | 1418(3)   | 9237(3)  | 6516(3)  | 26(1) |
| O(32)  | 2133(2)   | 9982(2)  | 6218(2)  | 33(1) |
| O(31)  | 1603(2)   | 8395(2)  | 6224(2)  | 36(1) |
| F(33)  | 334(3)    | 9945(2)  | 7906(2)  | 72(1) |
| F(34)  | -114(2)   | 8414(2)  | 7944(2)  | 50(1) |
| F(35)  | -1143(2)  | 10007(2) | 6766(2)  | 61(1) |
| C(36)  | 7569(3)   | 3690(3)  | 436(2)   | 24(1) |
| C(37)  | 6222(4)   | 3228(3)  | 1002(3)  | 36(1) |
| O(38)  | 7993(3)   | 3478(2)  | -388(2)  | 36(1) |

|        |          |          |          |       |
|--------|----------|----------|----------|-------|
| O(39)  | 8090(2)  | 4222(2)  | 860(2)   | 25(1) |
| F(38)  | 5690(13) | 3555(12) | 1819(7)  | 67(3) |
| F(37)  | 5061(9)  | 3608(14) | 348(11)  | 66(3) |
| F(36)  | 6609(15) | 2088(7)  | 1383(9)  | 65(3) |
| F(38A) | 6040(20) | 3212(19) | 1988(10) | 70(5) |
| F(37A) | 4944(14) | 3800(20) | 485(18)  | 80(6) |
| F(36A) | 6370(20) | 2175(9)  | 1022(13) | 63(4) |
| O(800) | 5887(3)  | 9680(2)  | 7630(2)  | 34(1) |
| O(400) | 8735(2)  | 6164(2)  | 9170(2)  | 22(1) |
| O(500) | 7011(3)  | 8179(2)  | 9552(2)  | 29(1) |
| O(300) | 8371(3)  | 9300(2)  | 503(2)   | 46(1) |
| O(600) | 6943(3)  | 9129(2)  | 2421(2)  | 39(1) |
| O(700) | 1661(3)  | 8507(2)  | 873(2)   | 48(1) |

---

**Table S13.** Bond lengths [Å] and angles [°] for boyd30.

---

|               |            |
|---------------|------------|
| C(25B)-N(26B) | 1.341(14)  |
| C(25B)-C(26B) | 1.372(15)  |
| C(25B)-H(25B) | 0.9500     |
| C(26B)-C(20)  | 1.378(16)  |
| C(26B)-H(26B) | 0.9500     |
| N(26B)-C(19)  | 1.325(13)  |
| C(25A)-N(26A) | 1.334(13)  |
| C(25A)-C(26A) | 1.390(16)  |
| C(25A)-H(25A) | 0.9500     |
| C(26A)-C(19)  | 1.380(16)  |
| C(26A)-H(26A) | 0.9500     |
| N(26A)-C(20)  | 1.317(13)  |
| Co(1)-N(2)    | 1.907(2)   |
| Co(1)-N(4)    | 1.909(2)   |
| Co(1)-N(6)    | 1.911(2)   |
| Co(1)-N(7)    | 1.913(2)   |
| Co(1)-N(5)    | 1.919(2)   |
| Co(1)-O(3)#1  | 1.9196(17) |
| O(8)-N(5)     | 1.401(3)   |
| O(8)-H(8)     | 0.77(3)    |
| O(11)-N(6)    | 1.408(3)   |
| O(11)-H(11)   | 0.90(3)    |

|              |            |
|--------------|------------|
| O(3)-N(2)    | 1.384(3)   |
| O(3)-Co(1)#1 | 1.9196(17) |
| O(10)-N(7)   | 1.408(3)   |
| O(10)-H(10)  | 0.79(3)    |
| C(19)-N(4)   | 1.347(3)   |
| C(19)-C(17)  | 1.545(4)   |
| C(20)-N(4)   | 1.348(3)   |
| C(20)-C(22)  | 1.537(4)   |
| N(2)-C(23)   | 1.302(3)   |
| N(5)-C(16)   | 1.297(3)   |
| N(12)-C(23)  | 1.324(4)   |
| N(12)-H(12A) | 0.86(3)    |
| N(12)-H(12B) | 0.76(3)    |
| N(13)-C(16)  | 1.333(4)   |
| N(13)-H(13A) | 0.87(3)    |
| N(13)-H(13B) | 0.85(3)    |
| N(14)-C(18)  | 1.316(4)   |
| N(14)-H(14A) | 0.79(3)    |
| N(14)-H(14B) | 0.79(3)    |
| N(15)-C(21)  | 1.316(4)   |
| N(15)-H(15A) | 0.82(3)    |
| N(15)-H(15B) | 0.82(3)    |
| N(7)-C(21)   | 1.293(3)   |
| N(6)-C(18)   | 1.301(4)   |
| C(22)-C(27)  | 1.527(4)   |
| C(22)-C(23)  | 1.538(4)   |
| C(22)-C(21)  | 1.545(4)   |
| C(17)-C(28)  | 1.525(4)   |
| C(17)-C(16)  | 1.525(4)   |
| C(17)-C(18)  | 1.544(4)   |
| C(27)-H(27A) | 0.9650     |
| C(27)-H(27B) | 0.9650     |
| C(27)-H(27C) | 0.9650     |
| C(28)-H(28A) | 0.9957     |
| C(28)-H(28B) | 0.9957     |
| C(28)-H(28C) | 0.9957     |
| C(30)-F(33)  | 1.313(4)   |
| C(30)-F(34)  | 1.329(4)   |

|                      |           |
|----------------------|-----------|
| C(30)-F(35)          | 1.345(4)  |
| C(30)-C(29)          | 1.512(4)  |
| C(29)-O(32)          | 1.251(4)  |
| C(29)-O(31)          | 1.252(4)  |
| C(36)-O(38)          | 1.235(4)  |
| C(36)-O(39)          | 1.250(4)  |
| C(36)-C(37)          | 1.544(4)  |
| C(37)-F(38A)         | 1.314(12) |
| C(37)-F(37A)         | 1.315(12) |
| C(37)-F(38)          | 1.316(8)  |
| C(37)-F(37)          | 1.323(8)  |
| C(37)-F(36A)         | 1.327(11) |
| C(37)-F(36)          | 1.334(8)  |
| O(800)-H(801)        | 0.81(4)   |
| O(800)-H(802)        | 0.99(3)   |
| O(400)-H(401)        | 0.92(3)   |
| O(400)-H(402)        | 0.85(3)   |
| O(500)-H(502)        | 0.82(3)   |
| O(500)-H(501)        | 0.91(3)   |
| O(300)-H(301)        | 0.985(10) |
| O(300)-H(302)        | 0.962(10) |
| O(600)-H(601)        | 1.063(19) |
| O(600)-H(602)        | 0.993(19) |
| O(700)-H(701)        | 0.90(3)   |
| O(700)-H(702)        | 0.94(3)   |
|                      |           |
| N(26B)-C(25B)-C(26B) | 123.2(13) |
| N(26B)-C(25B)-H(25B) | 118.4     |
| C(26B)-C(25B)-H(25B) | 118.4     |
| C(25B)-C(26B)-C(20)  | 118.5(17) |
| C(25B)-C(26B)-H(26B) | 120.7     |
| C(20)-C(26B)-H(26B)  | 120.7     |
| C(19)-N(26B)-C(25B)  | 115.8(14) |
| N(26A)-C(25A)-C(26A) | 123.5(12) |
| N(26A)-C(25A)-H(25A) | 118.2     |
| C(26A)-C(25A)-H(25A) | 118.2     |
| C(19)-C(26A)-C(25A)  | 117.6(18) |
| C(19)-C(26A)-H(26A)  | 121.2     |

|                      |            |
|----------------------|------------|
| C(25A)-C(26A)-H(26A) | 121.2      |
| C(20)-N(26A)-C(25A)  | 115.9(14)  |
| N(2)-Co(1)-N(4)      | 89.35(9)   |
| N(2)-Co(1)-N(6)      | 177.94(10) |
| N(4)-Co(1)-N(6)      | 88.66(9)   |
| N(2)-Co(1)-N(7)      | 88.95(9)   |
| N(4)-Co(1)-N(7)      | 87.18(9)   |
| N(6)-Co(1)-N(7)      | 90.40(9)   |
| N(2)-Co(1)-N(5)      | 92.63(9)   |
| N(4)-Co(1)-N(5)      | 86.65(9)   |
| N(6)-Co(1)-N(5)      | 87.80(9)   |
| N(7)-Co(1)-N(5)      | 173.62(9)  |
| N(2)-Co(1)-O(3)#1    | 90.92(8)   |
| N(4)-Co(1)-O(3)#1    | 173.81(9)  |
| N(6)-Co(1)-O(3)#1    | 90.99(8)   |
| N(7)-Co(1)-O(3)#1    | 86.64(8)   |
| N(5)-Co(1)-O(3)#1    | 99.51(8)   |
| N(5)-O(8)-H(8)       | 102(3)     |
| N(6)-O(11)-H(11)     | 105(2)     |
| N(2)-O(3)-Co(1)#1    | 119.32(14) |
| N(7)-O(10)-H(10)     | 98(2)      |
| N(26B)-C(19)-N(4)    | 124.2(11)  |
| N(26B)-C(19)-C(26A)  | 7(3)       |
| N(4)-C(19)-C(26A)    | 118.4(13)  |
| N(26B)-C(19)-C(17)   | 119.1(11)  |
| N(4)-C(19)-C(17)     | 116.5(2)   |
| C(26A)-C(19)-C(17)   | 125.1(13)  |
| N(26A)-C(20)-N(4)    | 124.6(11)  |
| N(26A)-C(20)-C(26B)  | 9(3)       |
| N(4)-C(20)-C(26B)    | 118.0(13)  |
| N(26A)-C(20)-C(22)   | 118.6(10)  |
| N(4)-C(20)-C(22)     | 116.7(2)   |
| C(26B)-C(20)-C(22)   | 125.2(13)  |
| C(19)-N(4)-C(20)     | 119.9(2)   |
| C(19)-N(4)-Co(1)     | 120.55(17) |
| C(20)-N(4)-Co(1)     | 119.52(18) |
| C(23)-N(2)-O(3)      | 115.8(2)   |
| C(23)-N(2)-Co(1)     | 122.04(19) |

|                     |            |
|---------------------|------------|
| O(3)-N(2)-Co(1)     | 122.16(15) |
| C(16)-N(5)-O(8)     | 112.5(2)   |
| C(16)-N(5)-Co(1)    | 123.31(19) |
| O(8)-N(5)-Co(1)     | 124.13(16) |
| C(23)-N(12)-H(12A)  | 117(2)     |
| C(23)-N(12)-H(12B)  | 123(2)     |
| H(12A)-N(12)-H(12B) | 118(3)     |
| C(16)-N(13)-H(13A)  | 119(2)     |
| C(16)-N(13)-H(13B)  | 121(2)     |
| H(13A)-N(13)-H(13B) | 119(3)     |
| C(18)-N(14)-H(14A)  | 116(2)     |
| C(18)-N(14)-H(14B)  | 125(2)     |
| H(14A)-N(14)-H(14B) | 116(3)     |
| C(21)-N(15)-H(15A)  | 116(2)     |
| C(21)-N(15)-H(15B)  | 123(2)     |
| H(15A)-N(15)-H(15B) | 120(3)     |
| C(21)-N(7)-O(10)    | 113.7(2)   |
| C(21)-N(7)-Co(1)    | 123.92(18) |
| O(10)-N(7)-Co(1)    | 121.92(16) |
| C(18)-N(6)-O(11)    | 114.7(2)   |
| C(18)-N(6)-Co(1)    | 123.91(18) |
| O(11)-N(6)-Co(1)    | 121.03(17) |
| C(27)-C(22)-C(20)   | 110.3(2)   |
| C(27)-C(22)-C(23)   | 111.9(2)   |
| C(20)-C(22)-C(23)   | 107.6(2)   |
| C(27)-C(22)-C(21)   | 111.3(2)   |
| C(20)-C(22)-C(21)   | 108.6(2)   |
| C(23)-C(22)-C(21)   | 107.0(2)   |
| C(28)-C(17)-C(16)   | 112.9(2)   |
| C(28)-C(17)-C(18)   | 111.1(2)   |
| C(16)-C(17)-C(18)   | 108.0(2)   |
| C(28)-C(17)-C(19)   | 110.0(2)   |
| C(16)-C(17)-C(19)   | 106.6(2)   |
| C(18)-C(17)-C(19)   | 108.0(2)   |
| C(22)-C(27)-H(27A)  | 109.5      |
| C(22)-C(27)-H(27B)  | 109.5      |
| H(27A)-C(27)-H(27B) | 109.5      |
| C(22)-C(27)-H(27C)  | 109.5      |



|                     |           |
|---------------------|-----------|
| H(27A)-C(27)-H(27C) | 109.5     |
| H(27B)-C(27)-H(27C) | 109.5     |
| C(17)-C(28)-H(28A)  | 109.5     |
| C(17)-C(28)-H(28B)  | 109.5     |
| H(28A)-C(28)-H(28B) | 109.5     |
| C(17)-C(28)-H(28C)  | 109.5     |
| H(28A)-C(28)-H(28C) | 109.5     |
| H(28B)-C(28)-H(28C) | 109.5     |
| N(2)-C(23)-N(12)    | 123.4(3)  |
| N(2)-C(23)-C(22)    | 115.9(2)  |
| N(12)-C(23)-C(22)   | 120.7(2)  |
| N(5)-C(16)-N(13)    | 124.1(3)  |
| N(5)-C(16)-C(17)    | 115.5(2)  |
| N(13)-C(16)-C(17)   | 120.3(2)  |
| N(7)-C(21)-N(15)    | 124.1(3)  |
| N(7)-C(21)-C(22)    | 114.0(2)  |
| N(15)-C(21)-C(22)   | 121.8(2)  |
| N(6)-C(18)-N(14)    | 124.5(3)  |
| N(6)-C(18)-C(17)    | 114.7(2)  |
| N(14)-C(18)-C(17)   | 120.8(3)  |
| F(33)-C(30)-F(34)   | 107.2(3)  |
| F(33)-C(30)-F(35)   | 106.0(3)  |
| F(34)-C(30)-F(35)   | 105.9(3)  |
| F(33)-C(30)-C(29)   | 114.6(3)  |
| F(34)-C(30)-C(29)   | 113.6(3)  |
| F(35)-C(30)-C(29)   | 109.0(3)  |
| O(32)-C(29)-O(31)   | 127.8(3)  |
| O(32)-C(29)-C(30)   | 116.0(3)  |
| O(31)-C(29)-C(30)   | 116.1(3)  |
| O(38)-C(36)-O(39)   | 128.4(3)  |
| O(38)-C(36)-C(37)   | 114.7(3)  |
| O(39)-C(36)-C(37)   | 116.9(3)  |
| F(38A)-C(37)-F(37A) | 109.0(14) |
| F(38A)-C(37)-F(38)  | 20.4(15)  |
| F(37A)-C(37)-F(38)  | 90.9(13)  |
| F(38A)-C(37)-F(37)  | 121.5(11) |
| F(37A)-C(37)-F(37)  | 15.3(19)  |
| F(38)-C(37)-F(37)   | 104.9(9)  |

|                      |           |
|----------------------|-----------|
| F(38A)-C(37)-F(36A)  | 107.5(13) |
| F(37A)-C(37)-F(36A)  | 102.5(14) |
| F(38)-C(37)-F(36A)   | 122.2(10) |
| F(37)-C(37)-F(36A)   | 89.7(11)  |
| F(38A)-C(37)-F(36)   | 88.2(12)  |
| F(37A)-C(37)-F(36)   | 120.6(12) |
| F(38)-C(37)-F(36)    | 105.9(9)  |
| F(37)-C(37)-F(36)    | 109.8(9)  |
| F(36A)-C(37)-F(36)   | 22.4(11)  |
| F(38A)-C(37)-C(36)   | 113.0(9)  |
| F(37A)-C(37)-C(36)   | 112.3(9)  |
| F(38)-C(37)-C(36)    | 113.9(7)  |
| F(37)-C(37)-C(36)    | 110.7(7)  |
| F(36A)-C(37)-C(36)   | 111.9(8)  |
| F(36)-C(37)-C(36)    | 111.3(6)  |
| H(801)-O(800)-H(802) | 101(3)    |
| H(401)-O(400)-H(402) | 103(3)    |
| H(502)-O(500)-H(501) | 109(3)    |
| H(301)-O(300)-H(302) | 82(3)     |
| H(601)-O(600)-H(602) | 99(3)     |
| H(701)-O(700)-H(702) | 96(3)     |

Symmetry transformations used to generate equivalent atoms:

#1 -x+1,-y+1,-z+1

**Table S14.** Anisotropic displacement parameters ( $\text{\AA}^2 \times 10^3$ ) for boyd30. The anisotropic displacement factor exponent takes the form:  $-2\pi [ h a^* U_{11} + \dots + 2 h k a^* b^* U_{12} ]$

|        | <sup>11</sup><br>U | <sup>22</sup><br>U | <sup>33</sup><br>U | <sup>23</sup><br>U | <sup>13</sup><br>U | <sup>12</sup><br>U |
|--------|--------------------|--------------------|--------------------|--------------------|--------------------|--------------------|
| C(25B) | 10(2)              | 17(6)              | 15(8)              | 0(8)               | -2(4)              | -4(4)              |
| C(26B) | 10(3)              | 17(4)              | 15(6)              | -3(5)              | -2(4)              | -1(4)              |
| N(26B) | 16(2)              | 18(4)              | 20(6)              | -6(5)              | -3(2)              | -5(1)              |
| C(25A) | 10(2)              | 17(6)              | 15(8)              | 0(8)               | -2(4)              | -4(4)              |
| C(26A) | 16(2)              | 18(4)              | 20(6)              | -6(5)              | -3(2)              | -5(1)              |
| N(26A) | 10(3)              | 17(4)              | 15(6)              | -3(5)              | -2(4)              | -1(4)              |
| Co(1)  | 9(1)               | 14(1)              | 11(1)              | -6(1)              | -1(1)              | -3(1)              |
| O(8)   | 24(1)              | 16(1)              | 16(1)              | -4(1)              | -3(1)              | -8(1)              |

|        |       |         |       |        |        |        |
|--------|-------|---------|-------|--------|--------|--------|
| O(11)  | 16(1) | 24(1)   | 29(1) | -13(1) | -7(1)  | 5(1)   |
| O(3)   | 11(1) | 11(1)   | 14(1) | -4(1)  | -1(1)  | -3(1)  |
| O(10)  | 13(1) | 22(1)   | 20(1) | -9(1)  | -4(1)  | 1(1)   |
| C(19)  | 12(1) | 12(1)   | 16(2) | -5(1)  | -2(1)  | -2(1)  |
| C(20)  | 12(1) | 13(1)   | 17(2) | -4(1)  | -1(1)  | -2(1)  |
| N(4)   | 11(1) | 14(1)   | 14(1) | -5(1)  | -1(1)  | -2(1)  |
| N(2)   | 10(1) | 14(1)   | 13(1) | -5(1)  | 0(1)   | -4(1)  |
| N(5)   | 14(1) | 13(1)   | 14(1) | -4(1)  | -1(1)  | -5(1)  |
| N(12)  | 27(1) | 19(1)   | 13(1) | -8(1)  | 5(1)   | -6(1)  |
| N(13)  | 23(1) | 17(1)   | 16(2) | -5(1)  | -8(1)  | -6(1)  |
| N(14)  | 21(1) | 20(1)   | 26(2) | -14(1) | -8(1)  | 0(1)   |
| N(15)  | 17(1) | 28(2)   | 13(1) | -7(1)  | -2(1)  | 0(1)   |
| N(7)   | 9(1)  | 14(1)   | 17(1) | -6(1)  | -1(1)  | -1(1)  |
| N(6)   | 11(1) | 15(1)   | 16(1) | -6(1)  | -3(1)  | 1(1)   |
| C(22)  | 12(1) | 16(1)   | 14(2) | -7(1)  | 1(1)   | -3(1)  |
| C(17)  | 11(1) | 17(2)   | 16(2) | -8(1)  | -1(1)  | -4(1)  |
| C(27)  | 19(2) | 21(2)   | 14(2) | -7(1)  | 2(1)   | -3(1)  |
| C(28)  | 22(2) | 21(2)   | 22(2) | -10(1) | -5(1)  | -8(1)  |
| C(23)  | 8(1)  | 19(2)   | 14(2) | -8(1)  | -2(1)  | -2(1)  |
| C(16)  | 8(1)  | 18(2)   | 16(2) | -10(1) | 1(1)   | -1(1)  |
| C(21)  | 14(1) | 14(1)   | 15(2) | -5(1)  | -2(1)  | -5(1)  |
| C(18)  | 17(2) | 15(2)   | 13(2) | -5(1)  | 1(1)   | -4(1)  |
| C(30)  | 32(2) | 35(2)   | 44(2) | -23(2) | 1(2)   | -12(2) |
| C(29)  | 23(2) | 26(2)   | 33(2) | -18(2) | 0(1)   | -3(1)  |
| O(32)  | 31(1) | 29(1)   | 42(2) | -15(1) | 5(1)   | -11(1) |
| O(31)  | 33(1) | 31(1)   | 51(2) | -22(1) | 9(1)   | -10(1) |
| F(33)  | 68(2) | 112(2)  | 90(2) | -84(2) | 43(2)  | -56(2) |
| F(34)  | 52(1) | 56(2)   | 44(1) | -18(1) | 16(1)  | -24(1) |
| F(35)  | 29(1) | 58(2)   | 80(2) | -22(1) | 5(1)   | 6(1)   |
| C(36)  | 29(2) | 20(2)   | 20(2) | -3(1)  | -2(1)  | -7(1)  |
| C(37)  | 32(2) | 42(2)   | 41(2) | -17(2) | -2(2)  | -16(2) |
| O(38)  | 54(2) | 34(1)   | 24(1) | -13(1) | 4(1)   | -18(1) |
| O(39)  | 27(1) | 27(1)   | 27(1) | -13(1) | 4(1)   | -12(1) |
| F(38)  | 42(5) | 128(8)  | 68(5) | -67(6) | 32(4)  | -47(5) |
| F(37)  | 44(4) | 97(6)   | 75(4) | -29(3) | -24(3) | -36(4) |
| F(36)  | 71(4) | 46(3)   | 69(7) | 3(3)   | 5(4)   | -31(2) |
| F(38A) | 62(8) | 139(11) | 31(4) | -24(5) | 14(4)  | -75(8) |
| F(37A) | 37(5) | 92(8)   | 86(8) | -4(7)  | -6(5)  | -12(4) |

|        |       |       |        |        |       |        |
|--------|-------|-------|--------|--------|-------|--------|
| F(36A) | 69(7) | 41(4) | 91(10) | -26(5) | 28(7) | -36(4) |
| O(800) | 38(2) | 35(1) | 33(2)  | -13(1) | -1(1) | -11(1) |
| O(400) | 24(1) | 25(1) | 18(1)  | -7(1)  | -2(1) | -9(1)  |
| O(500) | 34(1) | 28(1) | 24(1)  | -13(1) | 0(1)  | -4(1)  |
| O(300) | 58(2) | 42(2) | 47(2)  | -21(1) | -2(1) | -19(1) |
| O(600) | 34(1) | 37(1) | 52(2)  | -21(1) | 2(1)  | -12(1) |
| O(700) | 61(2) | 36(2) | 47(2)  | -24(1) | -4(1) | -1(1)  |

**Table S15:** Specified hydrogen bonds (with esds except fixed and riding H)

| D-H                                                          | H...A   | D...A    | <(DHA) | (Å)                           |
|--------------------------------------------------------------|---------|----------|--------|-------------------------------|
| <i>H-bonds in a single unit</i>                              |         |          |        |                               |
| 0.79(3)                                                      | 1.80(3) | 2.585(3) | 169(3) | <b>O10-H10...O11</b>          |
| 0.77(3)                                                      | 1.98(3) | 2.725(3) | 162(4) | <b>O8-H8...O3</b>             |
| <i>bifurcated H-bonds between the units</i>                  |         |          |        |                               |
| 0.79(3)                                                      | 2.69(3) | 2.848(3) | 93(2)  | <b>O10-H10...O3_\$1</b>       |
| ** No suitable H-bond found for O11...O3_\$1 = 3.001(3) Å ** |         |          |        |                               |
| 0.77(3)                                                      | 2.54(3) | 3.006(3) | 120(3) | <b>O8-H8...O10_\$1</b>        |
| ** No suitable H-bond found for O8...O11_\$1 = 4.900(3) Å ** |         |          |        |                               |
| <i>H-bonds to the first trifluoroacetate</i>                 |         |          |        |                               |
| 0.90(3)                                                      | 1.61(3) | 2.491(3) | 164(3) | <b>O11-H11...O31</b>          |
| 0.79(3)                                                      | 2.14(3) | 2.902(3) | 161(3) | <b>N14-H14A...O32</b>         |
| <i>H-bond to the second trifluoroacetate</i>                 |         |          |        |                               |
| 0.76(3)                                                      | 2.23(3) | 2.981(3) | 170(3) | <b>N12-H12B...O39</b>         |
| <i>H-bond in the "arch" linking amino functions</i>          |         |          |        |                               |
| 0.79(3)                                                      | 2.19(3) | 2.928(4) | 155(3) | <b>N14-H14B...O800_b</b>      |
| 0.91(3)                                                      | 1.81(3) | 2.717(3) | 172(3) | <b>O500_b-H501_b...O800_b</b> |
| 0.82(3)                                                      | 2.02(3) | 2.840(3) | 178(3) | <b>O500_b-H502_b...O400_b</b> |
| 0.85(3)                                                      | 2.10(3) | 2.914(3) | 161(3) | <b>N13-H13B...O400_b</b>      |

**Table S16:** Full HTAB analysis

Hydrogen bonds with H...A < r(A) + 2.000 Angstroms and <DHA > 110 deg.

| D-H   | d(D-H) | d(H..A) | <DHA   | d(D..A) | (Å)                     |
|-------|--------|---------|--------|---------|-------------------------|
| O8-H8 | 0.772  | 1.979   | 162.46 | 2.725   | O3                      |
| O8-H8 | 0.772  | 2.402   | 118.65 | 2.854   | N7 [ -x+1, -y+1, -z+1 ] |
| O8-H8 | 0.772  | 2.540   | 130.31 | 3.096   | N2                      |

|             |       |       |        |       |                             |
|-------------|-------|-------|--------|-------|-----------------------------|
| O8-H8       | 0.772 | 2.543 | 120.19 | 3.006 | O10 [ -x+1, -y+1, -z+1 ]    |
| O10-H10     | 0.793 | 1.802 | 169.14 | 2.585 | O11                         |
| O10-H10     | 0.793 | 2.441 | 134.33 | 3.049 | N6                          |
| N12-H12A    | 0.865 | 2.342 | 139.83 | 3.054 | O31 [ -x+1, -y+1, -z+1 ]    |
| N12-H12B    | 0.756 | 2.233 | 170.45 | 2.981 | O39                         |
| N13-H13A    | 0.873 | 2.234 | 138.12 | 2.942 | O38 [ x, y, z+1 ]           |
| N13-H13B    | 0.849 | 2.098 | 161.05 | 2.914 | O400_b                      |
| N14-H14A    | 0.790 | 2.142 | 161.45 | 2.902 | O32                         |
| N14-H14B    | 0.789 | 2.194 | 154.76 | 2.928 | O800_b                      |
| N15-H15A    | 0.821 | 2.513 | 151.65 | 3.259 | O700_b                      |
| N15-H15B    | 0.820 | 2.132 | 169.22 | 2.941 | O500_b [ x, y, z-1 ]        |
| O11-H11     | 0.898 | 1.615 | 164.17 | 2.491 | O31                         |
| O800-H801_b | 0.809 | 2.302 | 160.73 | 3.077 | O10 [ -x+1, -y+2, -z+1 ]    |
| O800-H801_b | 0.809 | 2.436 | 121.97 | 2.946 | F35 [ x+1, y, z ]           |
| O800-H802_b | 0.990 | 1.661 | 162.00 | 2.621 | O600_b [ -x+1, -y+2, -z+1 ] |
| O400-H401_b | 0.915 | 1.914 | 173.26 | 2.825 | O39 [ -x+2, -y+1, -z+1 ]    |
| O400-H402_b | 0.845 | 2.052 | 175.20 | 2.895 | O39 [ x, y, z+1 ]           |
| O500-H502_b | 0.823 | 2.017 | 178.17 | 2.840 | O400_b                      |
| O500-H501_b | 0.913 | 1.811 | 171.75 | 2.717 | O800_b                      |
| O300-H301_b | 0.985 | 2.042 | 130.40 | 2.784 | O700_b [ -x+1, -y+2, -z ]   |
| O300-H302_b | 0.962 | 1.886 | 168.55 | 2.835 | O500_b [ x, y, z-1 ]        |
| O600-H601_b | 1.063 | 1.744 | 169.77 | 2.796 | O32 [ -x+1, -y+2, -z+1 ]    |
| O600-H601_b | 1.063 | 2.446 | 112.02 | 3.011 | F33 [ -x+1, -y+2, -z+1 ]    |
| O600-H602_b | 0.993 | 1.794 | 157.66 | 2.738 | O300_b                      |
| O600-H602_b | 0.993 | 2.508 | 111.08 | 3.011 | F33 [ -x+1, -y+2, -z+1 ]    |
| O700-H701_b | 0.903 | 1.919 | 166.44 | 2.805 | O38 [ -x+1, -y+1, -z ]      |
| O700-H702_b | 0.944 | 2.124 | 144.88 | 2.946 | O300_b [ x-1, y, z ]        |

**End of electronic supporting information**
